# Supplementary material
Source: Springer Nature journal article supplement (https://www.springermedizin.de/resource/supplementary/12943_2013_1511_MOESM4_ESM.pdf/9552310)
Supplement: MOESM4 [file 9552310]

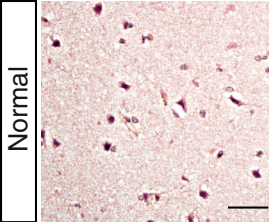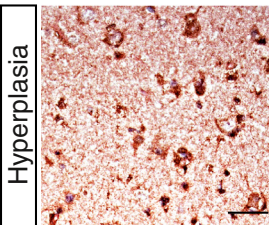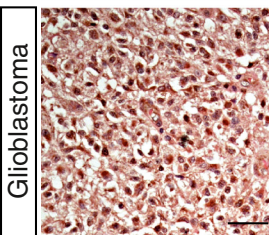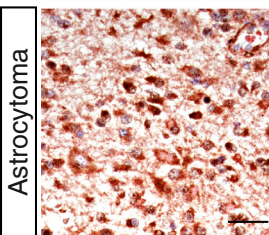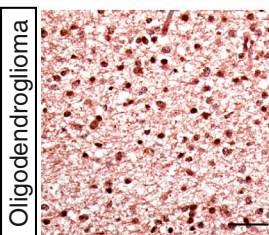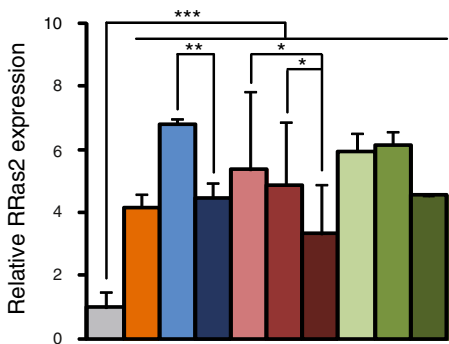

Brain tissue

Hyperplasia

Glioblastoma III

Glioblastoma IV

Astrocytoma I

Astrocytoma II

Astrocytoma III

Oligodendroglioma I

Oligodendroglioma II

Oligodendroglioma III

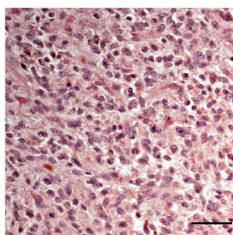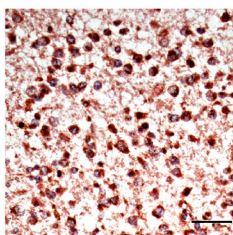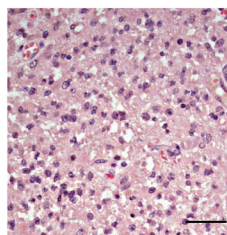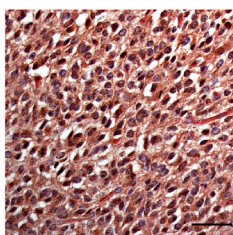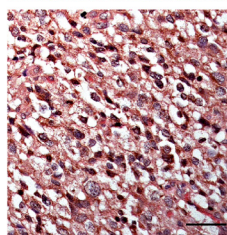

Grade
